# Supplementary material
Source: MDPI journal article supplement (https://www.mdpi.com/2311-7524/9/6/666)
Supplement: s1 [file s1]

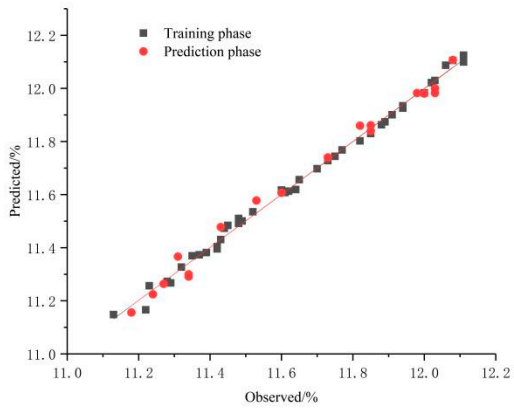

(a) trimf

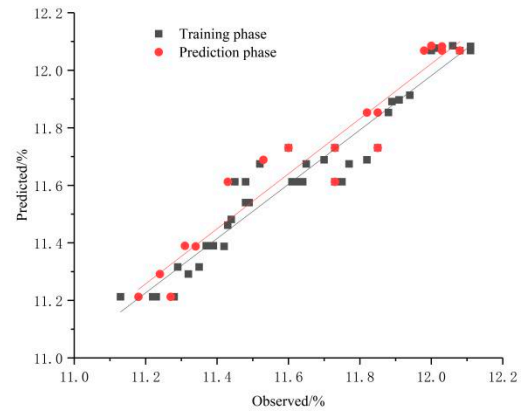

(b) trapmf

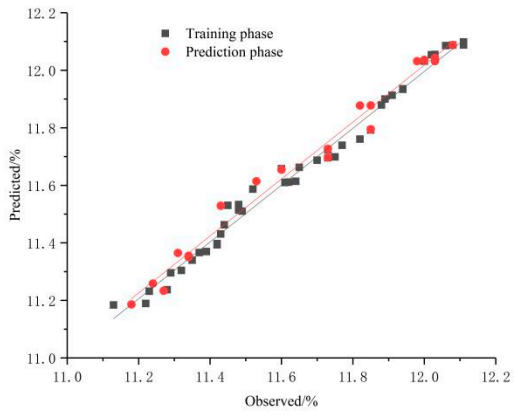

(c) gbellmf

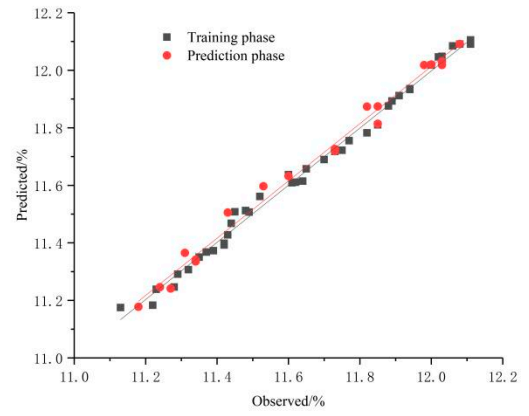

(d) gaussmf

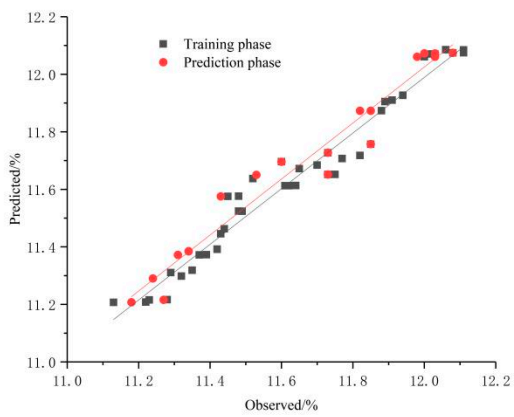

(e) gasuss2mf

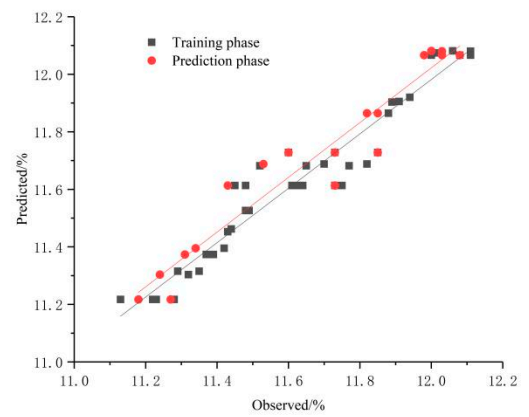

(f) pimf

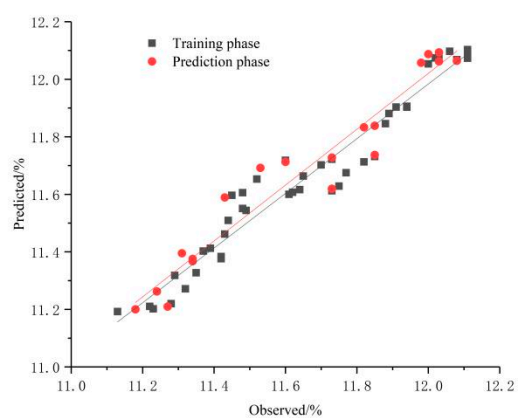

(g) dsigmf

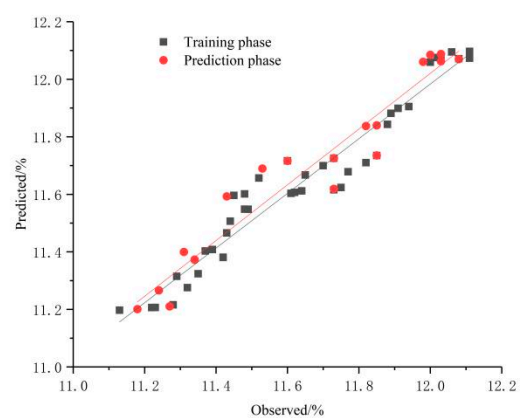

(h) psigmf

**Figure S2.** Correlation between observed value and predicted value of SSC in fragrant pears during storage in the training and prediction stages of ANFIS models with different membership functions.
